# Supplementary material
Source: Springer Nature journal article supplement (https://www.springermedizin.de/resource/supplementary/12971_2012_169_MOESM8_ESM.pdf/9595070)

**(A)**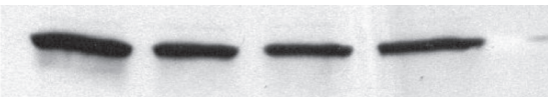

Controls      5% CSE      10% CSE      15% CSE

**(B)**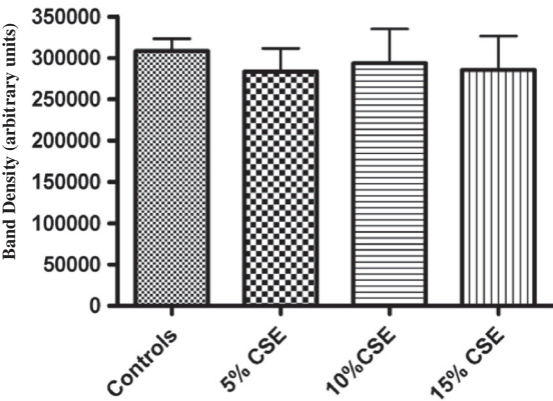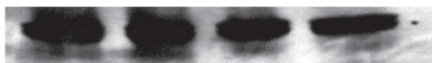

$\beta$ -Actin loading control

Supplement: MOESM8 [file 9595070]
